# Supplementary material for: Facile and expedient access to bis-coumarin–iminothiazole hybrids by molecular hybridization approach: synthesis, molecular modelling and assessment of alkaline phosphatase inhibition, anticancer and antileishmanial potential
Source: Royal Society of Chemistry journal article supplement (doi:10.1039/c5ra14900b), 2015-01-01
Supplement: c5ra14900b1.pdf [file c5ra14900b1.pdf]

**Facile and expedient access to bis-coumarin-iminothiazole hybrids by molecular hybridization approach: synthesis, molecular modelling and assessment of alkaline phosphatase inhibition, anticancer and antileishmanial potential**

AliyaIbrar<sup>a</sup>, SumeraZaib<sup>b</sup>, Imtiaz Khan<sup>a</sup>, FarukhJabeen<sup>c,d</sup>, JamshedIqbal<sup>b,\*</sup> and AamerSaeed<sup>a,\*</sup>

*<sup>a</sup>Department of Chemistry, Quaid-i-Azam University, Islamabad-45320, Pakistan*

*<sup>b</sup>Centre for Advanced Drug Research, COMSATS Institute of Information Technology, Abbottabad-22060, Pakistan*

*<sup>c</sup>Florida Center for Heterocyclic Compounds, Department of Chemistry, University of Florida, Fl. 32611, USA*

*<sup>d</sup>Center for Computationally Assisted Science and Technology, North Dakota State University, Fargo, ND, 58102, USA*

Table S1 Drug likeness of synthesized imino-thiazole hybrids (5c-m)

| Entry | b_1rotN | Weight   | lip_acc | lip_don | logP(o/w) |
|-------|---------|----------|---------|---------|-----------|
|       | (NoR)   | (MW)     | HBA     | HBD     | Log P     |
| 5c    | 4.0000  | 541.9710 | 8.0000  | 1.0000  | 7.1250    |
| 5d    | 5.0000  | 537.5520 | 9.0000  | 1.0000  | 6.4870    |
| 5e    | 5.0000  | 537.5520 | 9.0000  | 1.0000  | 6.5260    |
| 5f    | 4.0000  | 521.5530 | 8.0000  | 1.0000  | 6.8290    |
| 5g    | 4.0000  | 521.5530 | 8.0000  | 1.0000  | 6.8680    |
| 5h    | 4.0000  | 521.5530 | 8.0000  | 1.0000  | 6.8310    |
| 5i    | 4.0000  | 535.5800 | 8.0000  | 1.0000  | 7.1250    |
| 5j    | 4.0000  | 535.5800 | 8.0000  | 1.0000  | 7.1250    |
| 5k    | 4.0000  | 535.5800 | 8.0000  | 1.0000  | 7.1250    |
| 5l    | 4.0000  | 535.5800 | 8.0000  | 1.0000  | 7.1250    |
| 5m    | 4.0000  | 535.5800 | 8.0000  | 1.0000  | 7.2400    |

**Abbreviations used:**

NoR= Number of rotatable bonds

HBA=Hydrogen Bond Acceptor

HBD= Hydrogen Bond Donor

Log P (o/w)= logarithm of the (octanol/water) partition coefficient

TableS2 Molecular docking studies of synthesized bis-coumarin-iminothiazole hybrids against ALP (PDB ID: 4KJG)

| Compounds                                                                                 | IC <sub>50</sub><br>( $\mu$ M) | Binding Energy<br>(kcal/mol) |              | H-Bonding               |                              | Pi-H interactions       |                              | Hydrophobic<br>interactions | Polar<br>interactions                                                        |
|-------------------------------------------------------------------------------------------|--------------------------------|------------------------------|--------------|-------------------------|------------------------------|-------------------------|------------------------------|-----------------------------|------------------------------------------------------------------------------|
|                                                                                           |                                | S                            | London<br>dG | Interacting<br>residues | Distance<br>( $\text{\AA}$ ) | Interacting<br>residues | Distance<br>( $\text{\AA}$ ) |                             |                                                                              |
| 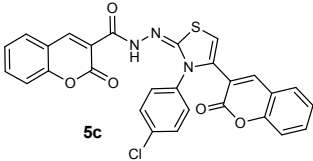<br>5c   | 5.78                           | -6.3456                      | -9.9581      |                         |                              | Tyr107<br>His432        | 4.28<br>4.9                  |                             | Thr431<br>His320<br>Ser429<br>Gln317<br>Tyr107<br>His153<br>Arg166<br>Lys108 |
| <br>5d  | 3.92                           | -6.4269                      | -11.4376     | Arg166<br>Ser92         |                              |                         |                              | Leu 427                     | Thr431<br>Tyr107<br>Ser429<br>His 320<br>Lys108<br>Arg166<br>Gln317          |
| <br>5e | 4.36                           | -6.8090                      | -10.6833     | His 320                 | 3.28                         | Tyr107                  | 3.98                         | Val89                       | Thr431<br>Tyr107<br>Ser428<br>His 320<br>Gln317                              |
|                                                                                           |                                |                              |              |                         |                              |                         |                              |                             | Thr431<br>His320<br>Ser429<br>Tyr107                                         |

## Supporting Information

|                                                                                                  |      |         |          |        |      |                  |      |       |                                                                                                  |
|--------------------------------------------------------------------------------------------------|------|---------|----------|--------|------|------------------|------|-------|--------------------------------------------------------------------------------------------------|
|                                                                                                  |      |         |          |        |      |                  | 3.95 |       | Tyr169<br>Arg166<br>Gln317<br>His155<br>Ser429<br>Arg150<br>His153<br>Lys108                     |
| 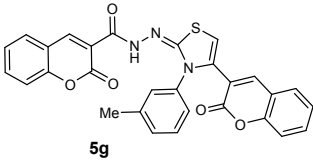<br><b>5g</b>   | 4.38 | -6.5504 | -9.4669  | Gln317 | 3.16 | Thr431<br>Ser429 |      | Val89 | Thr431<br>His320<br>Ser429<br>Tyr107<br>His432<br>Lys108                                         |
| <br><b>5h</b>  | 3.47 | -6.5368 | -11.0972 |        |      | Tyr107           | 3.95 | Val89 | Thr431<br>His320<br>Ser429<br>Tyr107<br>His153<br>Lys108<br>Gln317<br>Arg187<br>Arg166<br>Tyr169 |
| <br><b>5i</b> | 2.59 | -6.4065 | -9.9169  |        |      | Tyr107           | 3.95 | Val89 | Ser429<br>His320<br>Thr431<br>Ser429<br>His320                                                   |

## Supporting Information

|                                                                                     |      |         |          |                            |                      |                               |                      |        |                                                                              |
|-------------------------------------------------------------------------------------|------|---------|----------|----------------------------|----------------------|-------------------------------|----------------------|--------|------------------------------------------------------------------------------|
|                                                                                     |      |         |          |                            |                      |                               |                      |        | Arg166<br>Tyr169<br>His153<br>Arg150<br>Gln317                               |
| 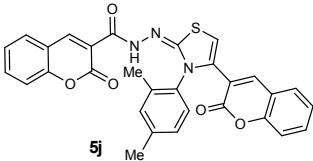   | 1.38 | -6.3487 | -10.1112 | Ser428                     | 3.62                 | Ser429<br>His432<br>His432    | 4.02<br>4.87<br>4.17 | Leu427 | Thr431<br>His320<br>Lys108<br>Ser429<br>Gln317<br>Tyr107<br>Lys108<br>His153 |
|    | 1.79 | -6.4156 | -10.4100 | Lys108                     | 2.97                 |                               |                      |        | Thr431<br>His320<br>Lys108<br>Arg166<br>Ser429<br>Gln317<br>Tyr107<br>His432 |
|  | 1.39 | -6.7520 | -11.1619 | His153<br>Lys108<br>Asp167 | 2.91<br>3.08<br>3.96 | His432-<br>Phenyl-<br>Lactone | 4.79                 |        | Thr431<br>His320<br>Lys108<br>Ser429<br>Gln317<br>Tyr107<br>Arg166<br>Ser429 |

**Supporting Information**

|                                                                                                    |      |         |         |  |  |        |      |       |                                                                                       |
|----------------------------------------------------------------------------------------------------|------|---------|---------|--|--|--------|------|-------|---------------------------------------------------------------------------------------|
|                                                                                                    |      |         |         |  |  |        |      |       | Arg150                                                                                |
| 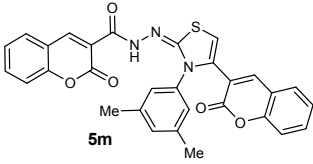 <p><b>5m</b></p> | 1.41 | -6.6342 | -9.8275 |  |  | Tyr107 | 3.97 | Val89 | Thr431<br>His320<br>Ser429<br>Gln317<br>His153<br>Lys108<br>Arg87<br>Tyr169<br>Arg166 |

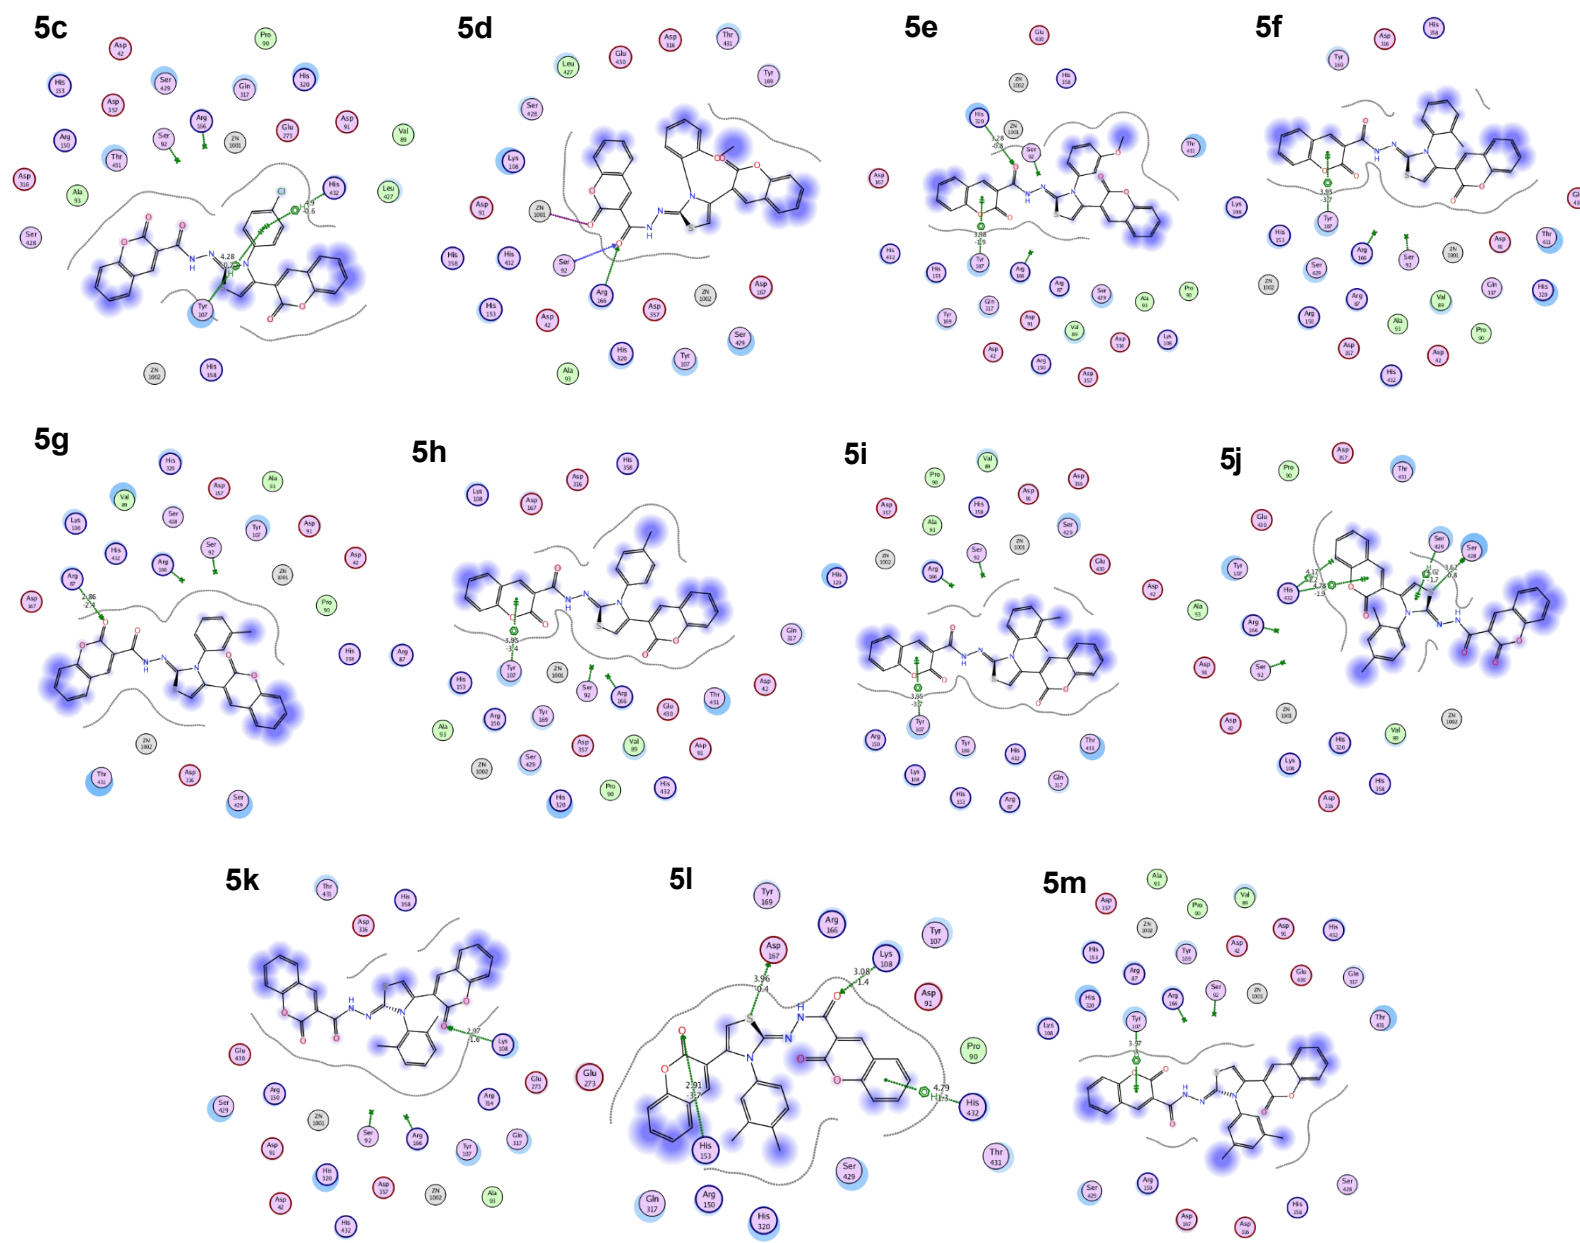

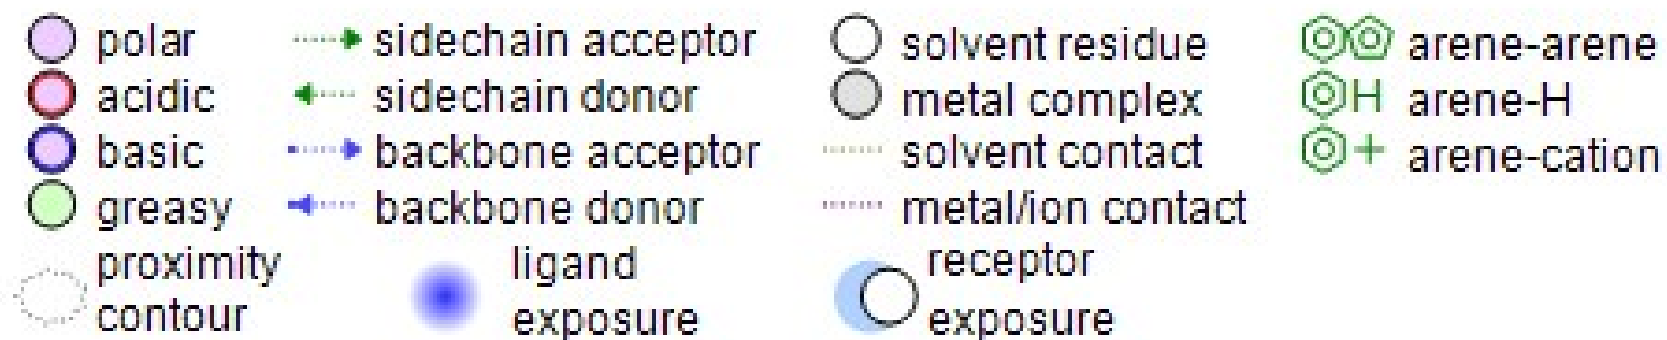

**Fig. S1** 2D interaction of compounds **5c-m** with ALP (color and pattern details are given in Legend).



## NMR Spectra

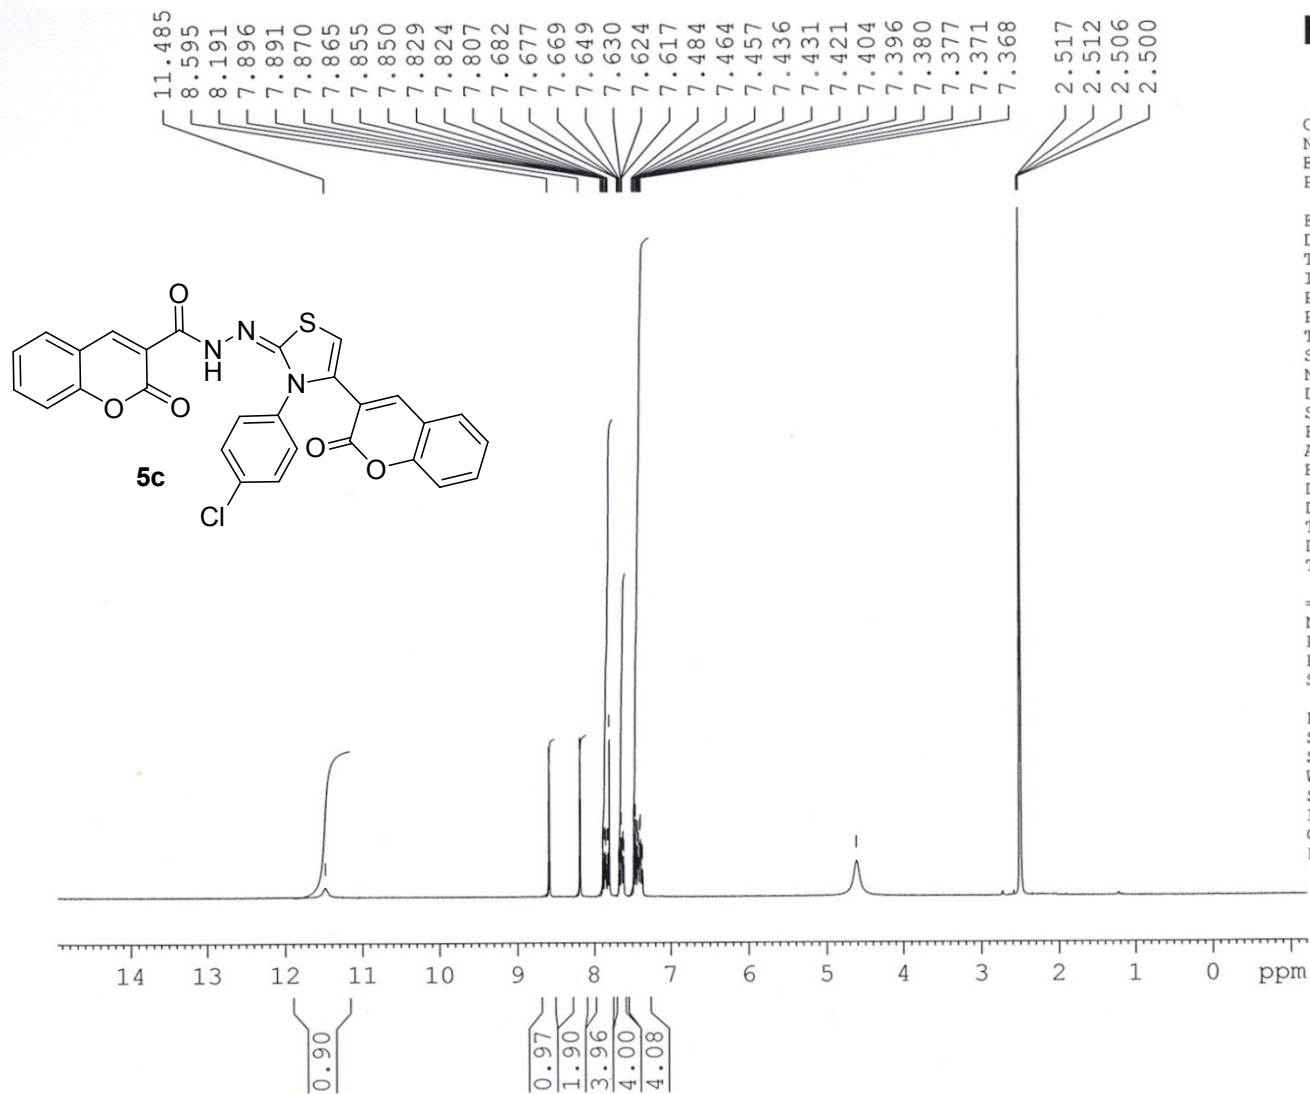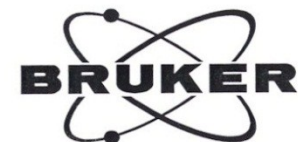

Current Data Parameters  
 NAME IT-3\_1HNMR\_DMSO  
 EXPNO 1  
 PROCNO 1

F2 - Acquisition Parameters  
 Date\_ 20130320  
 Time\_ 14.17  
 INSTRUM spect  
 PROBHD 5 mm BBO BB-1H  
 PULPROG zg30  
 TD 65536  
 SOLVENT CDCl3  
 NS 16  
 DS 0  
 SWH 6172.839 Hz  
 FIDRES 0.094190 Hz  
 AQ 5.3084660 sec  
 RG 645.1  
 DW 81.000 usec  
 DE 6.00 usec  
 TE 292.4 K  
 D1 1.00000000 sec  
 TD0 1

===== CHANNEL f1 =====  
 NUC1 1H  
 P1 9.00 usec  
 PL1 2.00 dB  
 SFO1 300.1318534 MHz

F2 - Processing parameters  
 SI 32768  
 SF 300.1300000 MHz  
 WDW EM  
 SSB 0  
 LB 0.30 Hz  
 GB 0  
 PC 1.00

Supporting Information

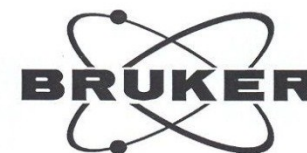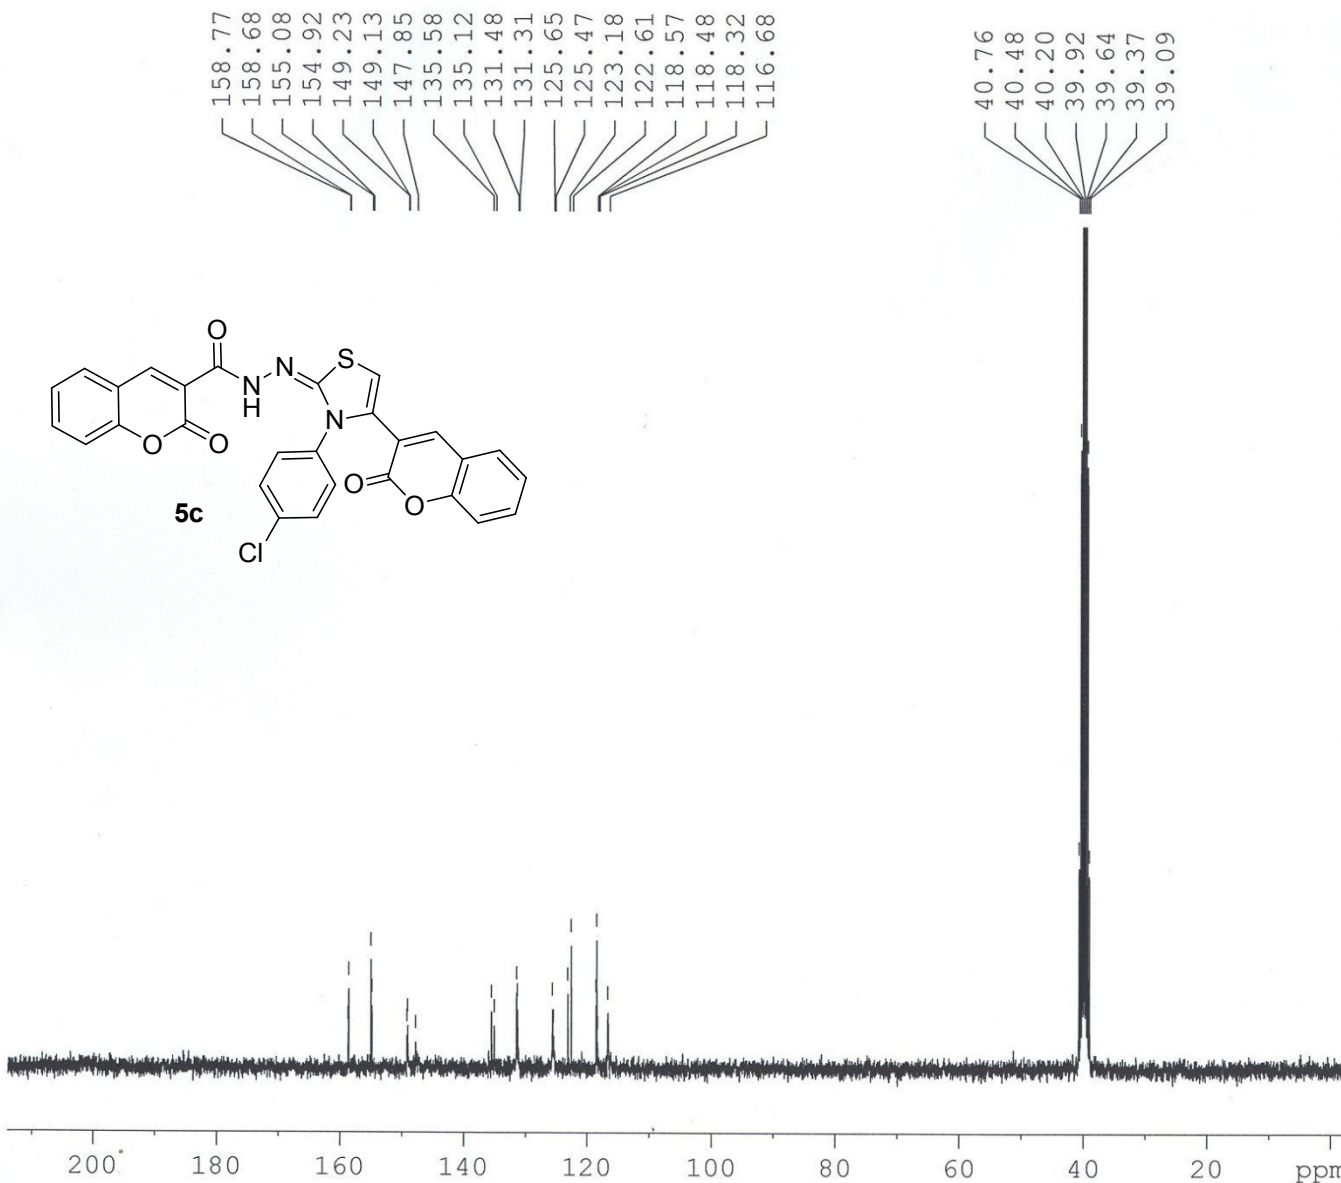

Current Data Parameters  
 NAME IT-3\_13CNMR\_DMSO  
 EXPNO 1  
 PROCNO 1

F2 - Acquisition Parameters  
 Date\_ 20130320  
 Time\_ 16.28  
 INSTRUM spect  
 PROBHD 5 mm BBO BB-1H  
 PULPROG zgpg30  
 TD 65536  
 SOLVENT DMSO  
 NS 279  
 DS 2  
 SWH 17985.611 Hz  
 FIDRES 0.274439 Hz  
 AQ 1.8219508 sec  
 RG 32768  
 DW 27.800 usec  
 DE 6.00 usec  
 TE 291.4 K  
 D1 2.00000000 sec  
 d11 0.03000000 sec  
 DELTA 1.899999998 sec  
 TD0 1

==== CHANNEL f1 =====  
 NUC1 13C  
 P1 6.00 usec  
 PL1 -5.00 dB  
 SFO1 75.4752953 MHz

==== CHANNEL f2 =====  
 CPDPRG2 waltz16  
 NUC2 1H  
 PCPD2 80.00 usec  
 PL2 2.00 dB  
 PL12 20.98 dB  
 PL13 20.00 dB  
 SFO2 300.1312005 MHz

F2 - Processing parameters  
 SI 32768  
 SF 75.4677490 MHz  
 WDW EM  
 SSB 0  
 LB 1.00 Hz  
 GB 0  
 PC 1.40

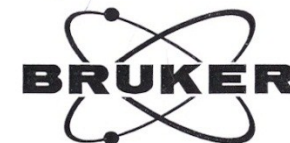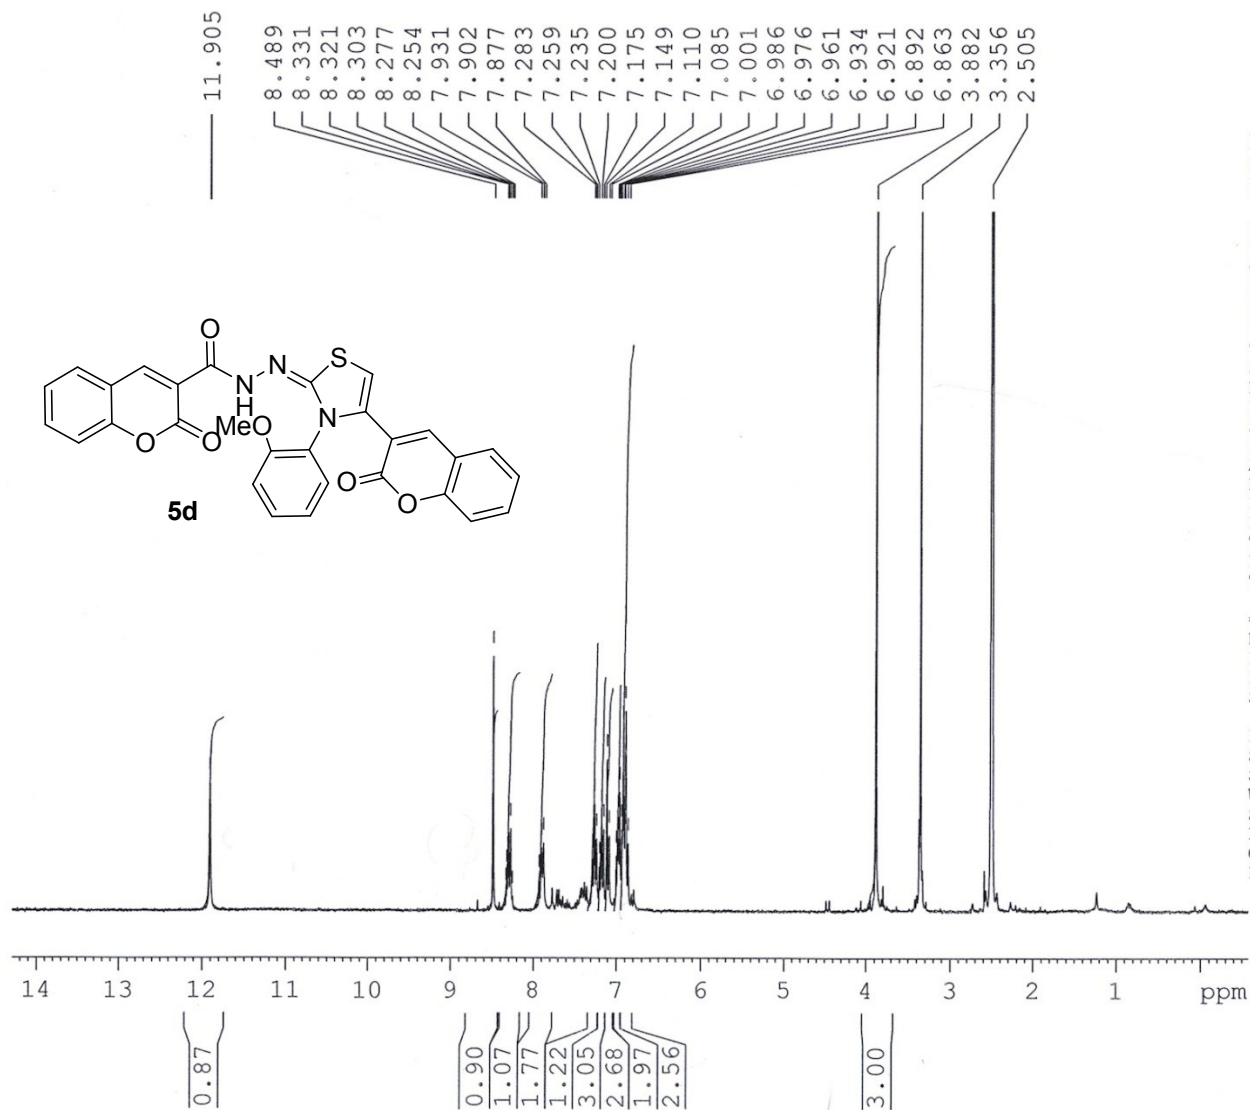

Current Data Parameters  
 NAME IT-1\_1HNMR\_DMSO  
 EXPNO 1  
 PROCNO 1

F2 - Acquisition Parameters  
 Date\_ 20120201  
 Time 11.15  
 INSTRUM spect  
 PROBHD 5 mm BBO BB-1H  
 PULPROG zg30  
 TD 65536  
 SOLVENT DMSO  
 NS 8  
 DS 0  
 SWH 6172.839 Hz  
 FIDRES 0.094190 Hz  
 AQ 5.3084660 sec  
 RG 574.7  
 DW 81.000 usec  
 DE 6.00 usec  
 TE 291.4 K  
 D1 1.00000000 sec  
 TD0 1

===== CHANNEL f1 =====  
 NUC1 1H  
 P1 9.00 usec  
 PL1 2.00 dB  
 SFO1 300.1318534 MHz

F2 - Processing parameters  
 SI 32768  
 SF 300.1300000 MHz  
 WDW EM  
 SSB 0  
 LB 0.30 Hz  
 GB 0  
 PC 1.00

Supporting Information

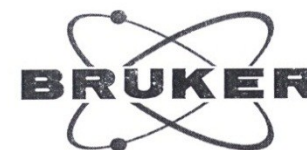

Current Data Parameters  
 NAME IT-1\_13CNMR\_dmsc  
 EXPNO 1  
 PROCNO 1

F2 - Acquisition Parameters  
 Date\_ 20120223  
 Time\_ 13.55  
 INSTRUM spect  
 PROBHD 5 mm BBO BB-1H  
 PULPROG zgpg30  
 TD 65536  
 SOLVENT DMSO  
 NS 539  
 DS 0  
 SWH 17985.611 Hz  
 FIDRES 0.274439 Hz  
 AQ 1.8219508 sec  
 RG 2580.3  
 DW 27.800 usec  
 DE 6.00 usec  
 TE 294.0 K  
 D1 2.00000000 sec  
 d11 0.03000000 sec  
 DELTA 1.899999998 sec  
 TD0 1

==== CHANNEL f1 =====  
 NUC1 13C  
 P1 6.00 usec  
 PL1 -5.00 dB  
 SFO1 75.4752953 MHz

==== CHANNEL f2 =====  
 CPDPRG2 waltz16  
 NUC2 1H  
 PCPD2 80.00 usec  
 PL2 2.00 dB  
 PL12 20.98 dB  
 PL13 20.00 dB  
 SFO2 300.1312005 MHz

F2 - Processing parameters  
 SI 32768  
 SF 75.4677490 MHz  
 WDW EM  
 SSB 0  
 LB 1.00 Hz  
 GB 0  
 PC 1.40

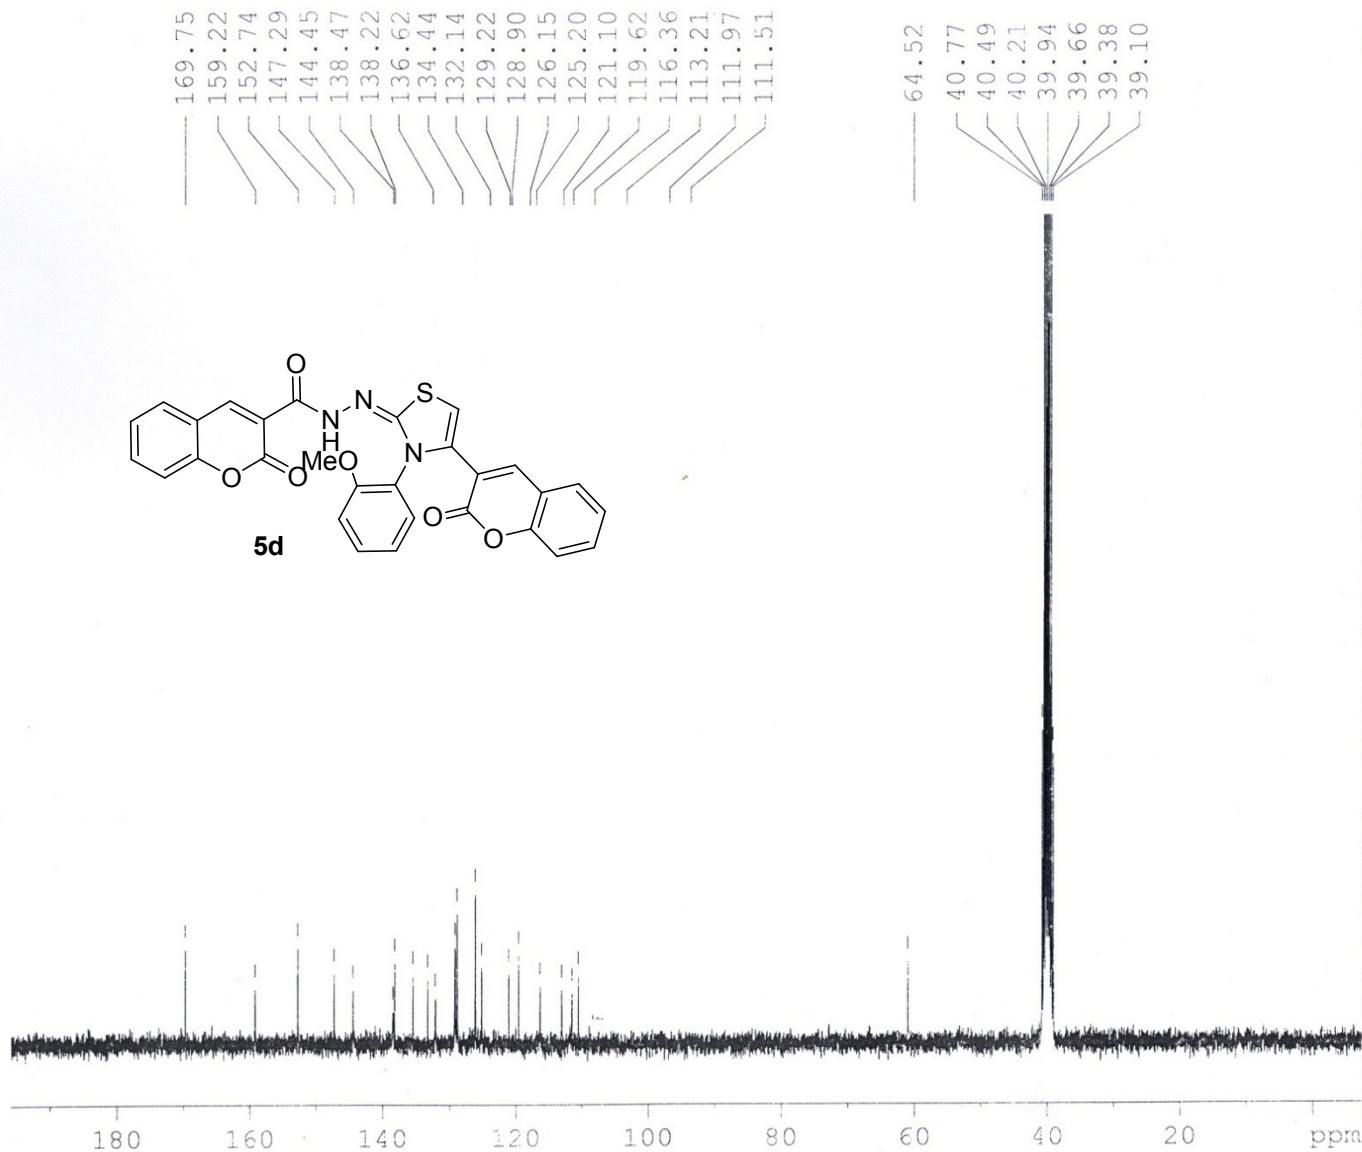

Supporting Information

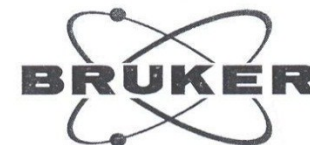

Current Data Parameters  
 NAME IT-2\_1HNMR\_DMSO  
 EXPNO 1  
 PROCNO 1

F2 - Acquisition Parameters  
 Date\_ 20121219  
 Time\_ 18.46  
 INSTRUM spect  
 PROBHD 5 mm BBO BB-1H  
 PULPROG zg30  
 TD 65536  
 SOLVENT DMSO  
 NS 4  
 DS 0  
 SWH 6172.839 Hz  
 FIDRES 0.094190 Hz  
 AQ 5.3084660 sec  
 RG 406.4  
 DW 81.000 usec  
 DE 6.00 usec  
 TE 293.5 K  
 D1 1.00000000 sec  
 TDO 1

===== CHANNEL f1 =====  
 NUC1 1H  
 P1 9.00 usec  
 PL1 2.00 dB  
 SFO1 300.1318534 MHz

F2 - Processing parameters  
 SI 32768  
 SF 300.1300000 MHz  
 WDW EM  
 SSB 0  
 LB 0.30 Hz  
 GB 0  
 PC 1.00

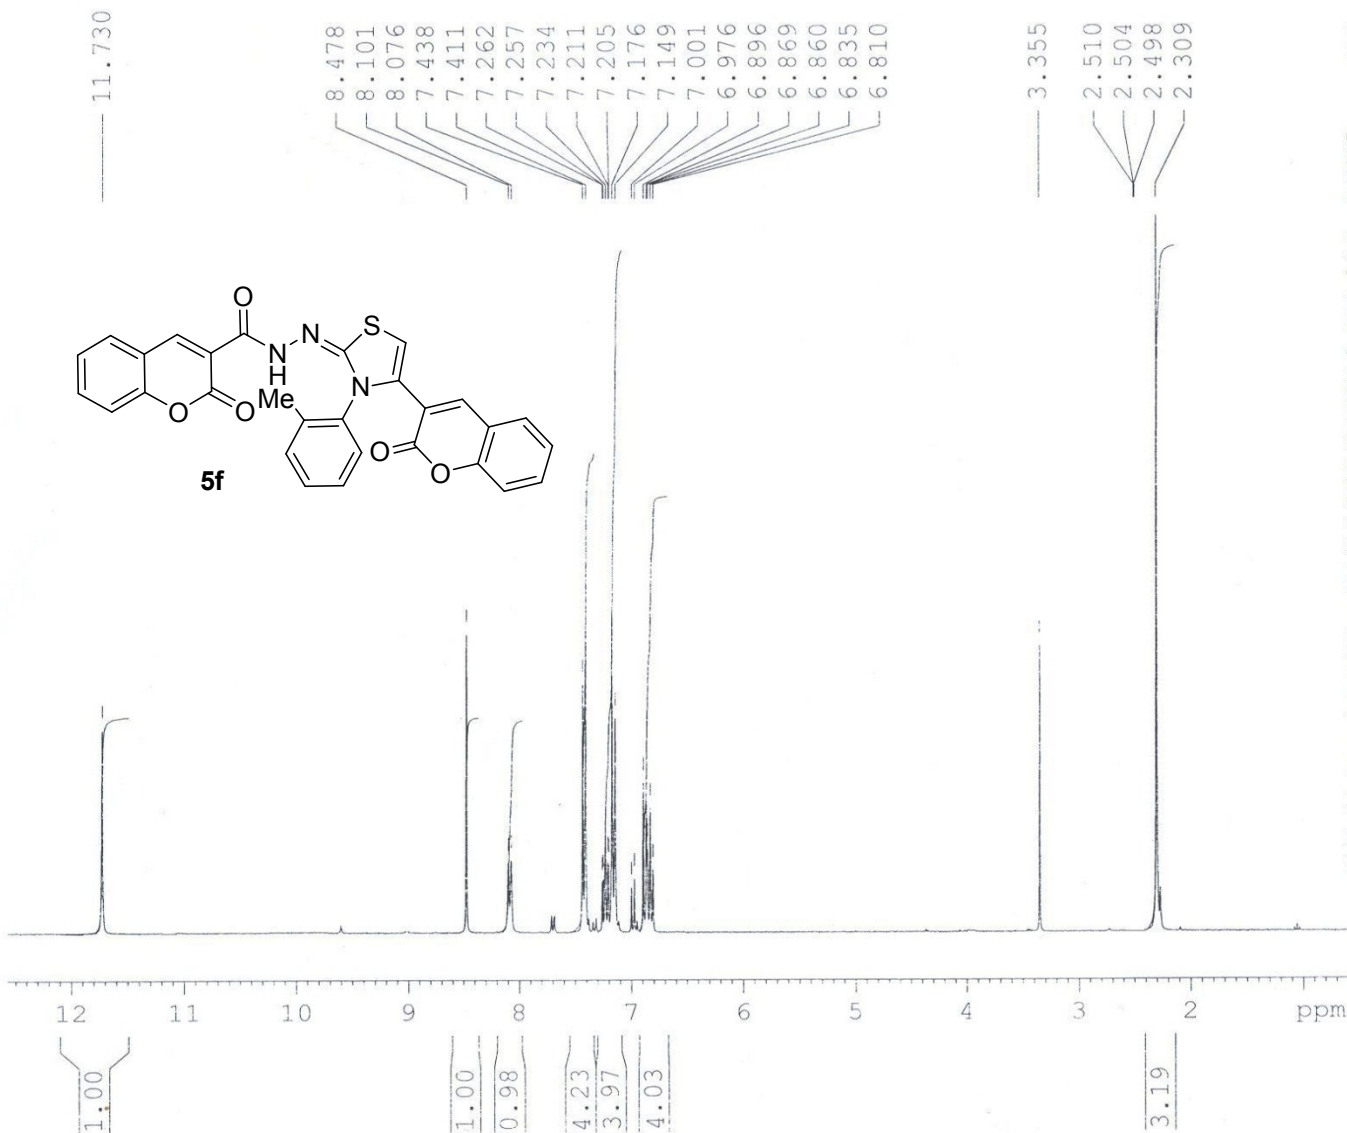



Supporting Information

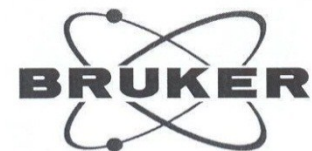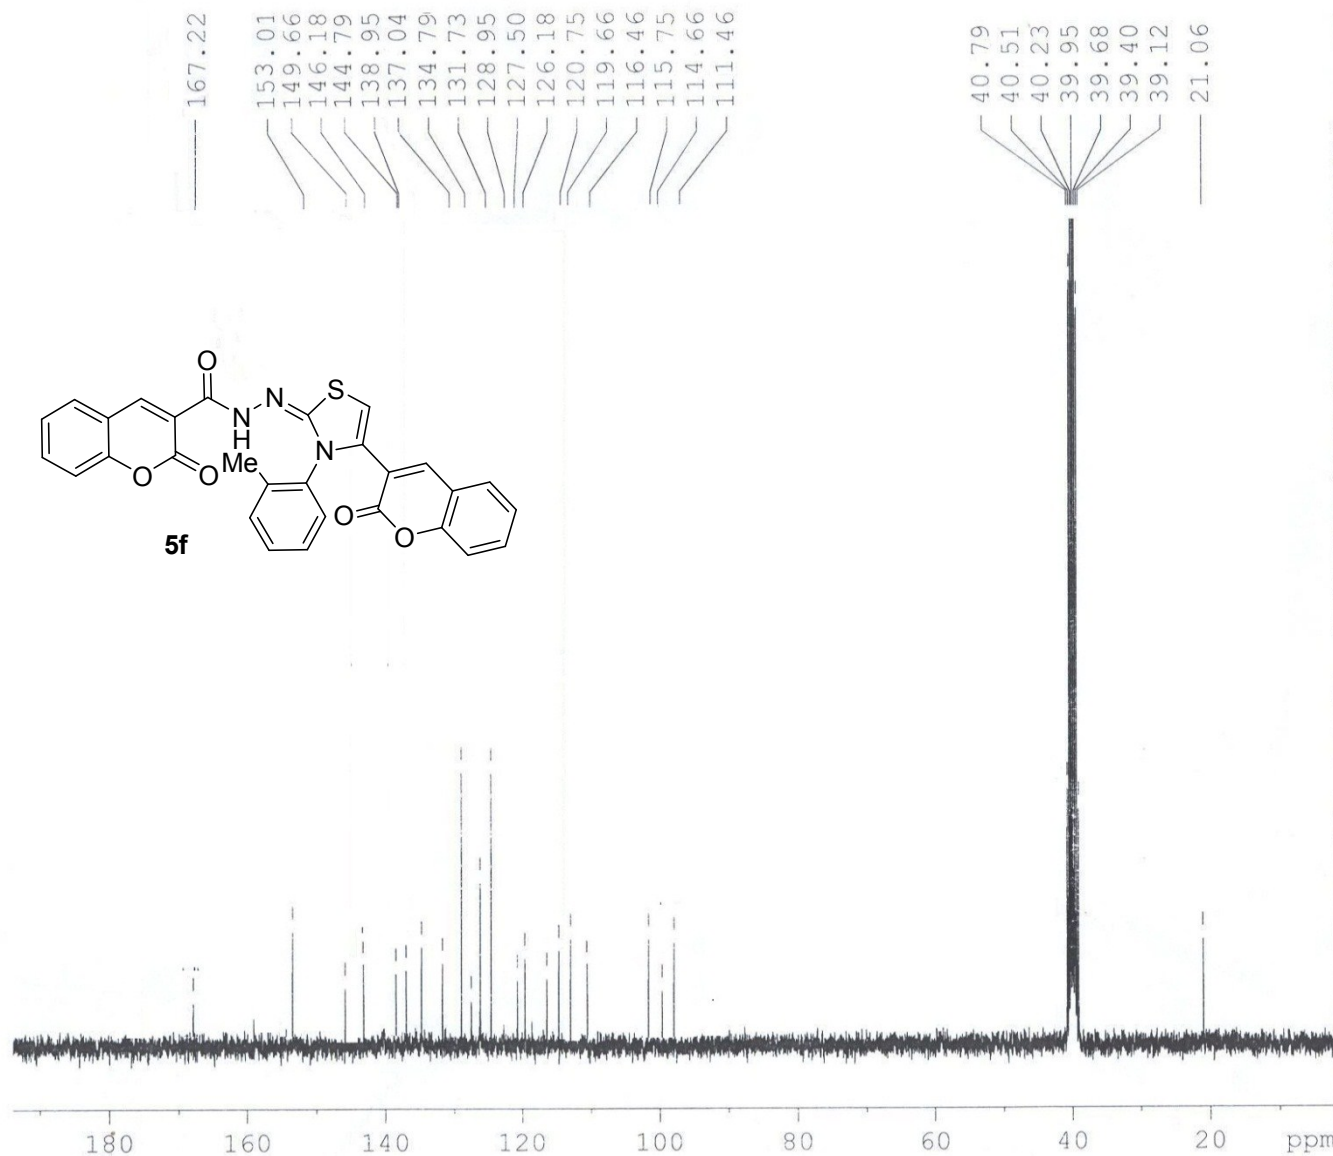

Current Data Parameters  
 NAME IT-2\_13CNMR\_DMSO  
 EXPNO 1  
 PROCNO 1

F2 - Acquisition Parameters  
 Date\_ 20121219  
 Time\_ 18.45  
 INSTRUM spect  
 PROBHD 5 mm BBO BB-1H  
 PULPROG zgpg30  
 TD 65536  
 SOLVENT DMSO  
 NS 256  
 DS 2  
 SWH 17985.611 Hz  
 FIDRES 0.274439 Hz  
 AQ 1.8219508 sec  
 RG 2580.3  
 DW 27.800 usec  
 DE 6.00 usec  
 TE 293.8 K  
 D1 2.00000000 sec  
 d11 0.03000000 sec  
 DELTA 1.89999998 sec  
 TD0 1

==== CHANNEL f1 =====  
 NUC1 13C  
 P1 6.00 usec  
 PL1 -5.00 dB  
 SFO1 75.4752953 MHz

==== CHANNEL f2 =====  
 CPDPRG2 waltz16  
 NUC2 1H  
 PCPD2 80.00 usec  
 PL2 2.00 dB  
 PL12 20.98 dB  
 PL13 20.00 dB  
 SFO2 300.1312005 MHz

F2 - Processing parameters  
 SI 32768  
 SF 75.4677490 MHz  
 WDW EM  
 SSB 0  
 LB 1.00 Hz  
 GB 0  
 PC 1.40
